# Supplementary material for: Transcriptomic analysis of intestine following administration of a transglutaminase 2 inhibitor to prevent gluten-induced intestinal damage in celiac disease
Source: PubMed Central journal article supplement (PMC11224021; doi:10.1038/s41590-024-01867-0), 2024-06-24
Supplement: 41590_2024_1867_MOESM1_ESM.pdf [file 41590_2024_1867_MOESM1_ESM.pdf]

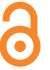

---

# **Transcriptomic analysis of intestine following administration of a transglutaminase 2 inhibitor to prevent gluten-induced intestinal damage in celiac disease**

---

In the format provided by the authors and unedited

---

## **Supplementary Files**

**Supplementary Table 1: Demographic Characteristics of the Patients in original cohort and in present study.**

**Supplementary Table 2: Effect of ZED1227 Treatment on the Ratio of villus height to crypt depth (VH:CrD) in original cohort and in present study.**

**Supplementary Fig. 1: Expression of common genes.**

**Supplementary Fig. 2: Transcriptional factors enrichment.**

**Supplementary Fig. 3: Cell type proportions according to the results of duodenal biopsies bulk transcriptomics deconvolution.**

**Supplementary Fig. 4: Immune Signaling Pathways, TG2 mRNA levels and TG2 activity during ZED1227 treatment.**

**Supplementary Fig. 5: ZED1227 treatment of human intestinal organoids.**

**Supplementary Table 1: Demographic Characteristics of the Patients in original cohort and in present study.**

| Characteristic          | Original cohort*            |                     | Present study cohort |                      |
|-------------------------|-----------------------------|---------------------|----------------------|----------------------|
|                         | ZED1227, 100 mg<br>(N = 39) | Placebo<br>(N = 38) | Drug<br>(d, n=34)    | Placebo<br>(p, n=24) |
| Age — yr (mean ± sd)    | 41.0±14.8                   | 42.5±14.4           | 40.7±15.1            | 43.2±14.9            |
| Female sex — no. (%)    | 24 (62)                     | 28 (74)             | 22 (64.7)            | 17 (70.8)            |
| White race — no. (%)    | 39 (100)                    | 38 (100)            | 34 (100)             | 24 (100)             |
| Weight — kg (mean ± sd) | 73.2±13.7                   | 68.4±14.7           | 74.1±13.9            | 71.4±17.0            |

\*Original cohort Demographic Characteristics is published in Schuppan, D. et al. A Randomized Trial of a Transglutaminase 2 Inhibitor for Celiac Disease. N. Engl. J. Med. 385, 35–45 (2021).

**Supplementary Table 2: Effect of ZED1227 Treatment on the Ratio of villus height to crypt depth (VH:CrD) in original cohort and in present study.**

| Variable                 | Original cohort*            |                           | Present study cohort      |                           |
|--------------------------|-----------------------------|---------------------------|---------------------------|---------------------------|
|                          | ZED1227, 100 mg<br>(N = 38) | Placebo<br>(N = 30)       | Drug<br>(d, n=34)         | Placebo<br>(p, n=24)      |
| VH:CrD                   |                             |                           |                           |                           |
| GFD                      | 2.09±0.35                   | 1.98±0.33                 | 2.11±0.34                 | 1.95±0.36                 |
| PGC                      | 1.94±0.48                   | 1.39±0.61                 | 1.89±0.40                 | 1.35±0.65                 |
| Change from GFD (95% CI) | -0.13<br>(-0.28 to 0.03)    | -0.61<br>(-0.78 to -0.44) | -0.21<br>(-0.36 to -0.07) | -0.59<br>(-0.83 to -0.35) |

\*Original cohort VH:CrD descriptive statistics is published in Schuppan, D. et al. A Randomized Trial of a Transglutaminase 2 Inhibitor for Celiac Disease. N. Engl. J. Med. 385, 35–45 (2021).

Plus-minus values are means ±SD. The change from GFD is presented as a least-squares means estimate.

**Supplementary Fig. 1**

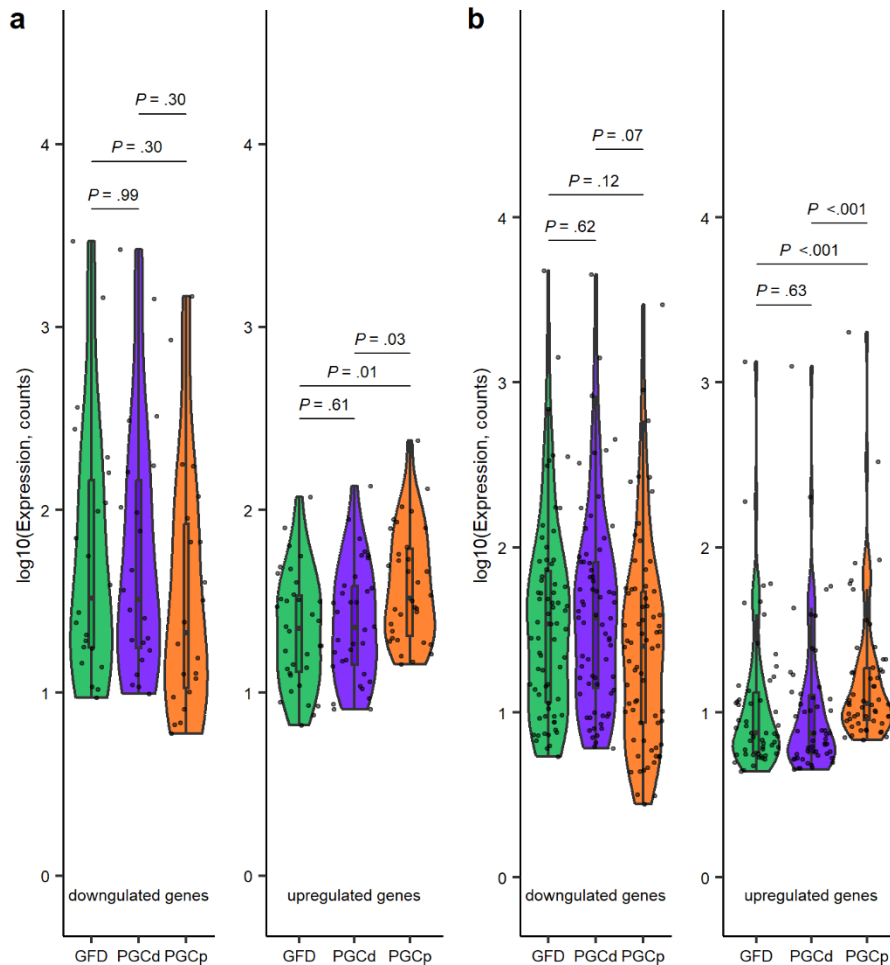

**Supplementary Fig. 1: Expression of common genes. a,** Violin plots showing the log-transformed expression of 56 common (in PGCp VS PGCd and PGCp VS GFDp comparisons) DEGs down-regulated (left panel) and up-regulated (right panel). **b,** Violin plot of 124 uniquely differentially expressed genes in PGCp VS PGCd comparison'. Kruskal-Wallis test followed by the Dunn's post hoc test was used for group comparisons. Statistical significance was defined as a  $P < .05$ . **a:** downregulated genes: GFD-PGCd  $P = 0.99$ , PGCp-GFD  $P = 0.30$ , PGCd-PGCp  $P = 0.30$ ; upregulated genes: GFD-PGCd  $P = 0.61$ , PGCp-GFD  $P = 0.01$ , PGCd-PGCp  $P = 0.03$ ; **b:** downregulated genes: GFD-PGCd  $P = 0.62$ , PGCp-GFD  $P = 0.12$ , PGCd-PGCp  $P = 0.07$ ; upregulated genes: GFD-PGCd  $P = 0.63$ , PGCp-GFD  $P = 6.68 \times 10^{-4}$ , PGCd-PGCp  $P = 1.98 \times 10^{-4}$ . The box plot center lines represent the median, the box boundaries represent IQR and the whisker length minimum and maximum range. Values from individual patients are shown. GFD ( $n = 58$ ), PGCd ( $n = 34$ ), and PGCp ( $n = 23$ )

**Supplementary Fig. 2**

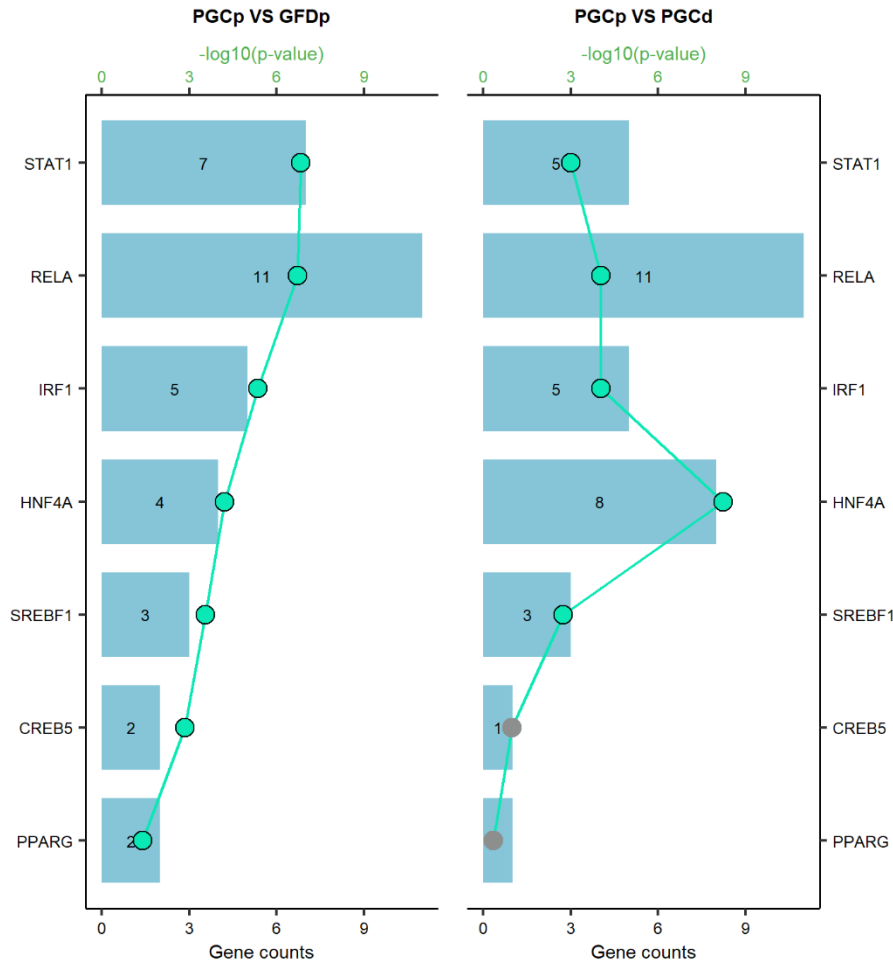

**Supplementary Fig. 2: Transcriptional factors enrichment.** Barplot of enriched transcriptional factors in PGCp vs GFDp (left) and PGCp vs PGCD (right) comparisons. Fisher's exact test was used for p-values calculation. Green and gray dots denote significant and non-significant adjusted p-values, respectively. Statistical significance was defined as a  $P < .05$  ( $-\log_{10}(p\text{-value}) > 1.3$ ).

**Supplementary Fig. 3**

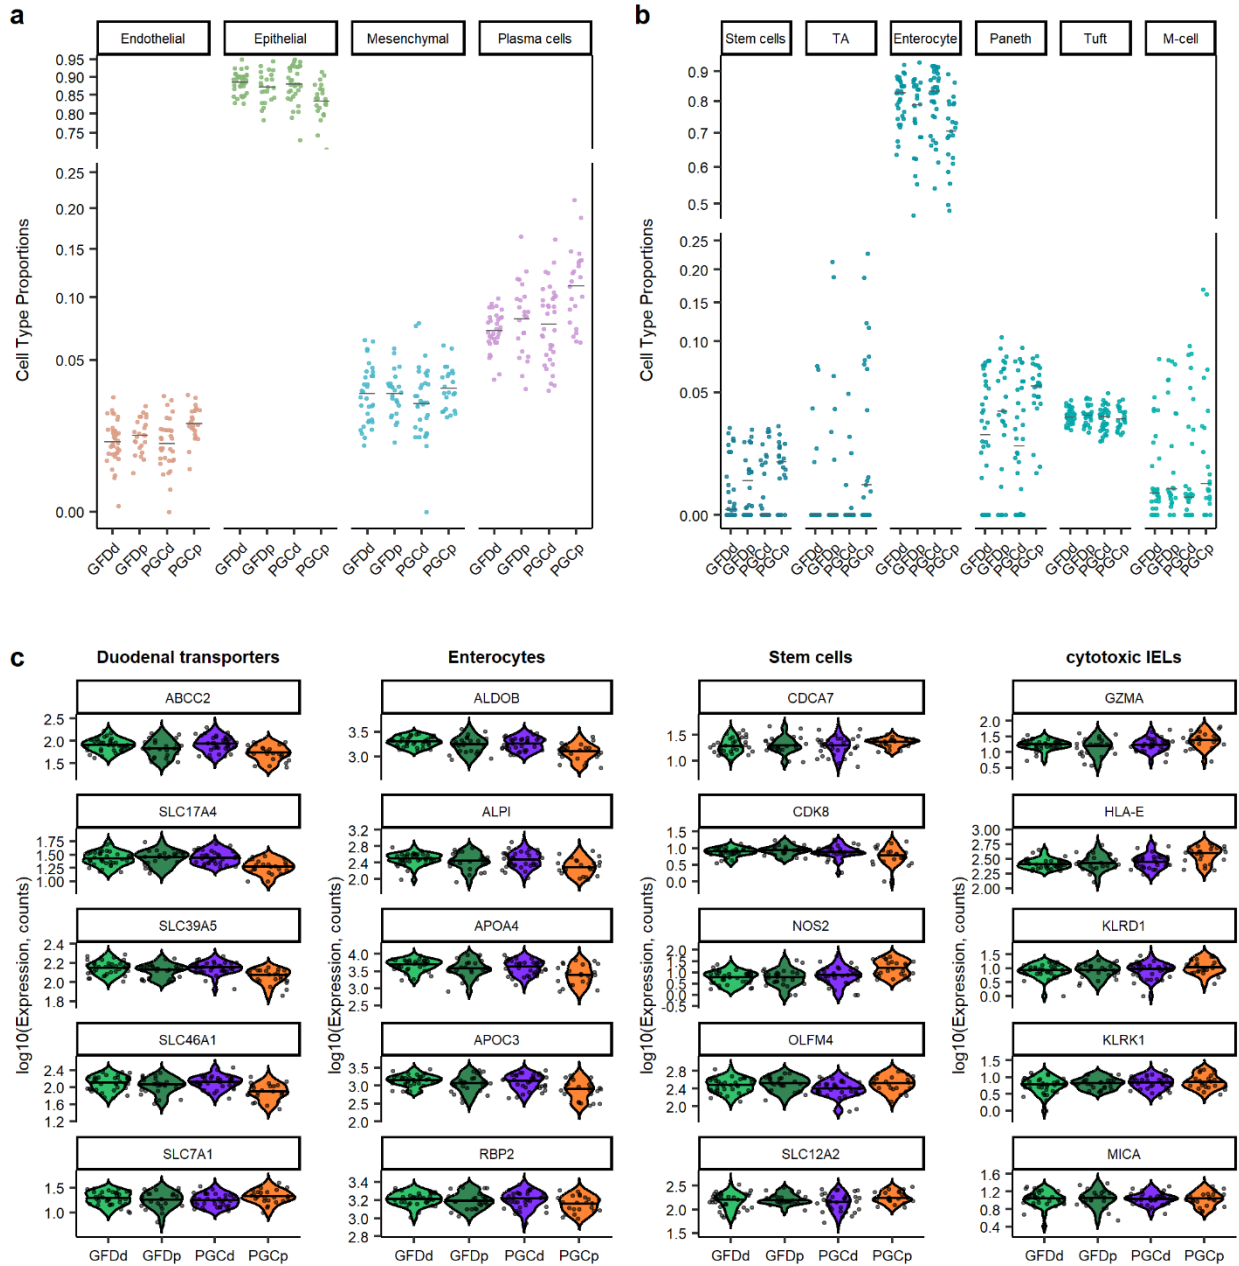

**Supplementary Fig. 3: Cell type proportions according to the results of duodenal biopsies bulk transcriptomics deconvolution for cell category **a**, and cell type **b**, for patients in drug and placebo groups on GFD and at PGC (GFDd, n = 34; GFDp, n = 24; PGCd, n = 34; PG Cp, n = 23). The horizontal line represents mean. **c**, Violin plots for selected genes expression. Midline denotes the median. GFDd, n = 34; GFDp, n = 24; PGCd, n = 34; PG Cp, n = 23.**

**Supplementary Fig. 4**

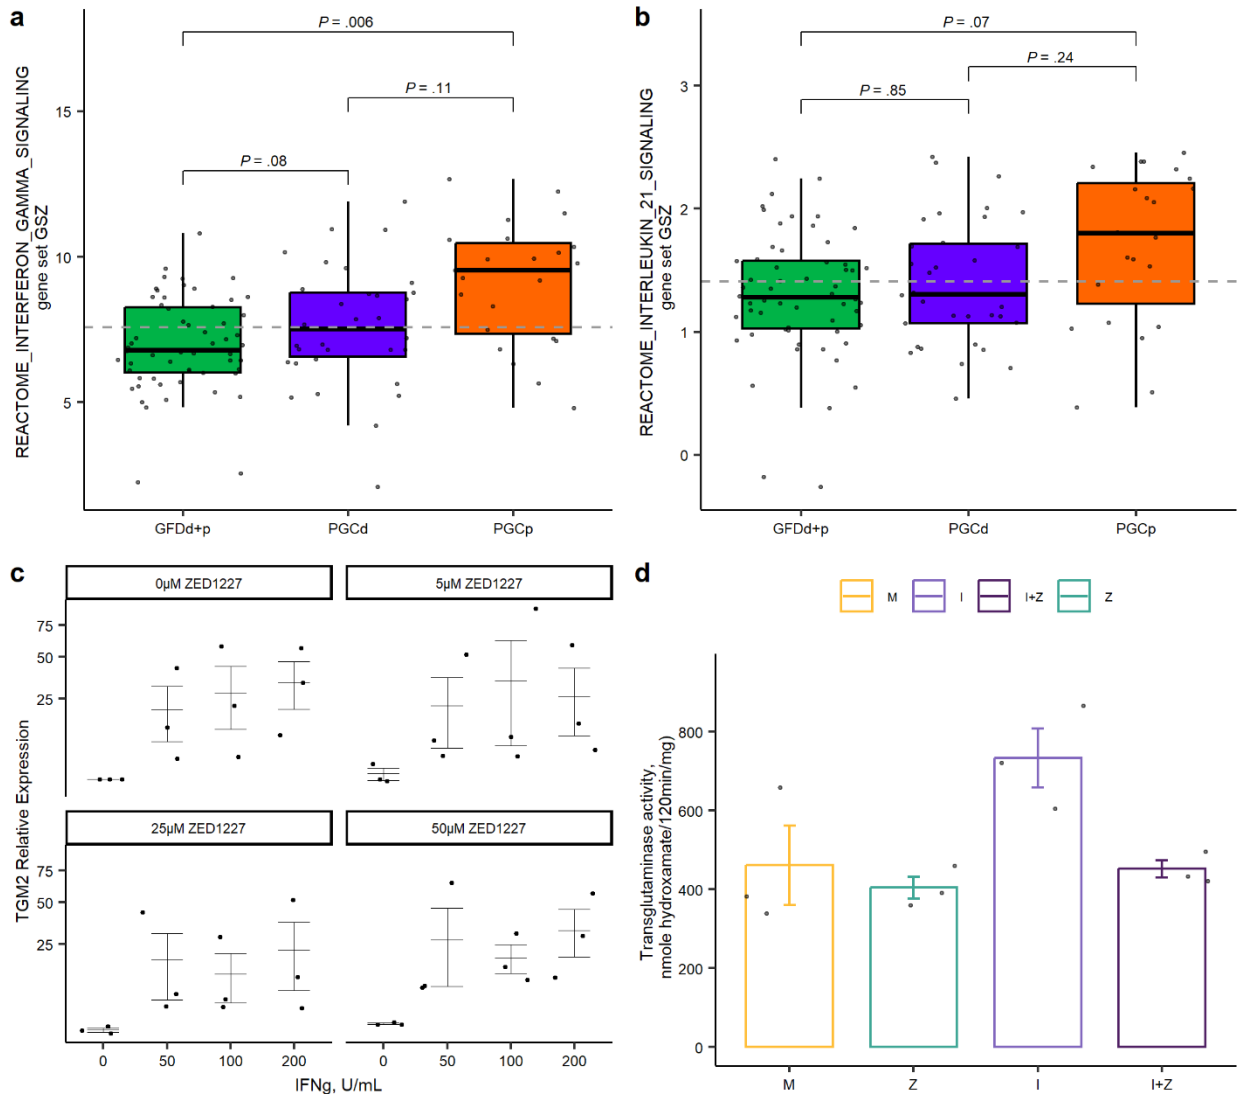

**Supplementary Fig. 4: Immune Signaling Pathways, TG2 mRNA levels and TG2 activity during ZED1227 treatment.** **a**, Gene set Z-score analyses for the Reactome pathway database gene set “Interferon-gamma signaling” gene set. **b**, Gene set Z-score analyses for the Reactome pathway database gene set “Interleukin-21 signaling” gene set. In **a** and **b**, GSZ scores were compared among groups using asymptotic p-value estimation, with statistical significance defined as  $P < .05$ . The box plot center lines represent the median, the box boundaries represent IQR and the whisker length minimum and maximum range. Values from individual patients are shown. GFDd+p ( $n = 58$ ), PGcd ( $n = 34$ ), and PGCp ( $n = 23$ ). **c**, Quantitative RT-PCR of TGM2 expression in human duodenal organoids ( $n = 3$ ) treated with human recombinant IFN $\gamma$  and/or ZED1227 at specified concentrations. Gene-specific Ct values were normalized ( $\Delta\Delta$ Ct) based on GAPDH house-keeping gene expression and relative to non-treated sample (0 U/mL IFN $\gamma$  and 0 mM ZED1227). Data shown as mean  $\pm$  SE. **d**, Colorimetric TG activity assay in Caco2 cells treated with 100 U/mL IFN $\gamma$  (I,  $n = 3$ ), 50  $\mu$ M ZED1227 (Z,  $n = 3$ ), their combination (I+Z,  $n = 3$ ), or mock (M,  $n = 3$ ) for 24 h. Data represented as mean  $\pm$  SE.



**Supplementary Fig. 5**

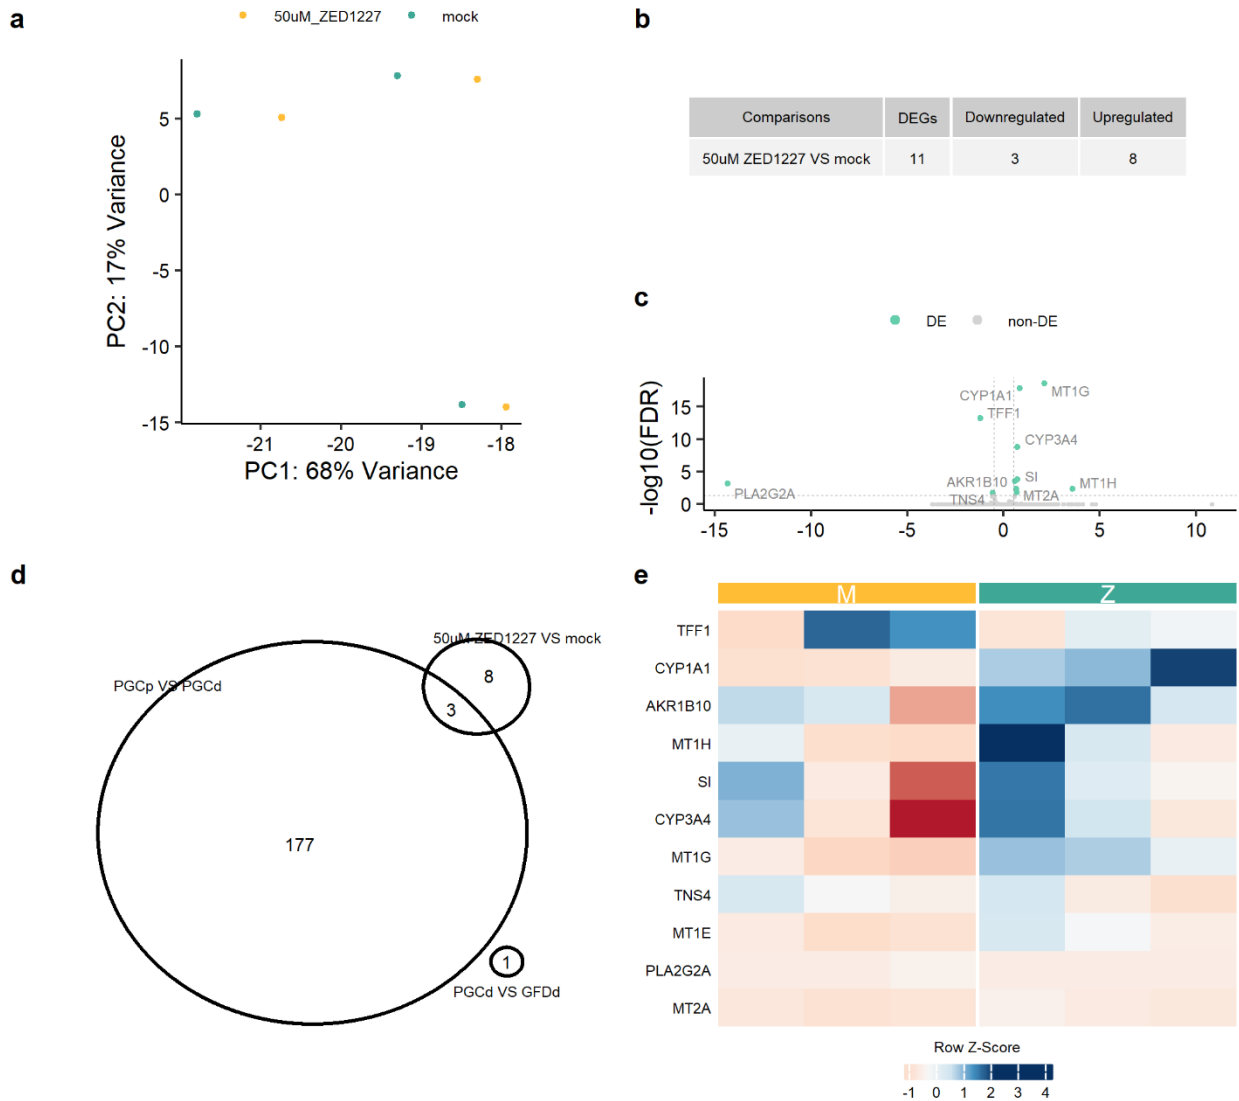

**Supplementary Fig. 5: ZED1227 treatment of human intestinal organoids.** **a**, Principal component analysis (PCA) plot using DESeq2-transformed counts for all organoid samples ( $n = 3$ ), treated with  $50\mu\text{M}$  ZED1227 ( $n = 3$ ) or mock-treated ( $n = 3$ ) for 24 hours. **b**, Table showing the number of differentially expressed genes (DEGs) ( $\log_2\text{FC} \geq |0.5|$  and  $\text{FDR} \leq .05$ ) in the  $50\mu\text{M}$  ZED1227 VS mock comparison. **c**, Volcano plot representations of DEGs ( $n = 11$ ) in  $50\mu\text{M}$  ZED1227 VS mock comparison. The green dots indicate DEGs ( $\text{FDR} \leq 0.05$ ) above the threshold ( $\log_2\text{FC} \geq 0.5$  and  $\leq -0.5$ ). The dashed horizontal line represents the FDR threshold of 0.05, and the vertical dashed lines represent the  $\log_2\text{FC}$  thresholds ( $\geq |0.5|$ ). **d**, Venn diagram illustrating the number of DEGs that are shared in the PGCp VS PGCd, PGCd VS GFDD and  $50\mu\text{M}$  ZED1227 VS mock comparisons. **e**, Heatmap of the 11 DEGs in  $50\mu\text{M}$  ZED1227 VS mock comparison. Genes ordered according to their  $\log_2\text{FC}$ . Z-score of normalized expression is plotted.  $50\mu\text{M}$  ZED1227 ( $n = 3$ ), mock-treated ( $n = 3$ ).

## #List of CEC-3 Trial Group Collaborators

### Investigators

| <b>Country</b> | <b>Principal Investigator</b>         | <b>Institution</b>                                                                                                                                                            |
|----------------|---------------------------------------|-------------------------------------------------------------------------------------------------------------------------------------------------------------------------------|
| Estonia        | <b>Karin Kull, MD</b>                 | Department of Gastroenterology, Internal Medicine Clinic, Tartu University Hospital, Tartu                                                                                    |
| Finland        | <b>Jari Koskenpato, MD</b>            | Lääkärikeskus Aava Helsinki Kamppi, Helsinki                                                                                                                                  |
|                | <b>Mika Scheinin, MD, PhD</b>         | Clinical Research Services Turku - CRST Oy, Turku                                                                                                                             |
|                | <b>Marja-Leena Lähdeaho, MD, PhD*</b> | Faculty of Medicine and Health Technology, Tampere University and Tampere University Hospital, Tampere<br>*and Department of Pediatrics, Tampere University Hospital, Tampere |
| Germany        |                                       |                                                                                                                                                                               |
|                | <b>Michael Schumann, MD</b>           | Department for Gastroenterology, Infectious diseases and Rheumatology, Campus Benjamin Franklin, Charité - University Medicine Berlin, Berlin                                 |
|                | <b>Yurdagül Zopf, MD</b>              | Department of Medicine 1, Hector Center for Nutrition, Exercise, and Sports, Universitätsklinikum Erlangen, Friedrich-Alexander-University Erlangen-Nürnberg, Erlangen        |
|                | <b>Andreas Stallmach, MD</b>          | Department of Internal Medicine IV, Jena University Hospital, Friedrich-Schiller University Jena, Jena                                                                        |
|                | <b>Ansgar W. Lohse, MD</b>            | I. Department of Medicine, University Medical Center Hamburg-Eppendorf, Hamburg                                                                                               |
|                | <b>Stefano Fusco, MD</b>              | Division of Gastroenterology, Hepatology, Infectious Diseases, Department of Internal Medicine I, University Hospital Tübingen, Tübingen                                      |
| Germany        | <b>Jost Langhorst, MD</b>             | Department for Internal and Integrative Medicine, Kliniken Essen-Mitte, Essen                                                                                                 |
|                | <b>Jost Langhorst, MD</b>             | Department for Internal and Integrative Medicine, Sozialstiftung Bamberg, Chair for Integrative Medicine, University of Duisburg-Essen, Bamberg                               |
|                | <b>Helga Paula Török, MD</b>          | Department of Medicine II, University Hospital, LMU Munich, Munich                                                                                                            |
| Ireland        | <b>Valerie Byrnes, MD</b>             | University College Hospital Galway, Galway                                                                                                                                    |

| <b>Country</b> | <b>Principal Investigator</b> | <b>Institution</b>                                                                                                                                               |
|----------------|-------------------------------|------------------------------------------------------------------------------------------------------------------------------------------------------------------|
| Lithuania      | <b>Juozas Kupcinskas, MD</b>  | Gastroenterology Department and Institute for Digestive Research, Lithuanian University of Health Sciences, Kaunas                                               |
| Norway         | <b>Øistein Hovde, MD, PhD</b> | Medical Department, Innlandet Hospital Trust, Gjøvik                                                                                                             |
|                | <b>Jørgen Jahnsen, MD</b>     | Akershus University Hospital, Lørenskog                                                                                                                          |
| Switzerland    | <b>Luc Biedermann, MD</b>     | Department of Gastroenterology and Hepatology, University Hospital Zürich, Zürich                                                                                |
|                | <b>Jonas Zeitz, MD</b>        | Swiss Celiac Center, Center of Gastroenterology, Clinic Hirslanden, Zürich and Department of Gastroenterology and Hepatology, University Hospital Zürich, Zürich |
